# Supplementary material for: Advanced materials from corn: isosorbide-based epoxy resins
Source: Royal Society of Chemistry journal article supplement (doi:10.1039/c4py00514g), 2014-01-01
Supplement: c4py00514g1.pdf [file c4py00514g1.pdf]

## Advanced Materials from Corn: Isosorbide-Based Epoxy Resins

J. Hong,<sup>a</sup> D. Radojicic,<sup>a</sup> M. Ionescu,<sup>a</sup> Z. S. Petrovic,<sup>\*a</sup> and E. Eastwood<sup>b</sup>

<sup>a</sup> Kansas Polymer Research Center, Pittsburg State University, Pittsburg, KS, USA.

E-mail: [zpetrovic@pittstate.edu](mailto:zpetrovic@pittstate.edu)

<sup>b</sup> Honeywell FM&T, LLC, Kansas City, MO , USA.

### Supporting Information

**Fig. S1-S4:** Proton and carbon NMR spectra of DGEIs prepared by different methods and ISODA.

**Fig.5-6:** DSC and TMA curves for the DGEBA and DGEI cured with DETA and ISODA

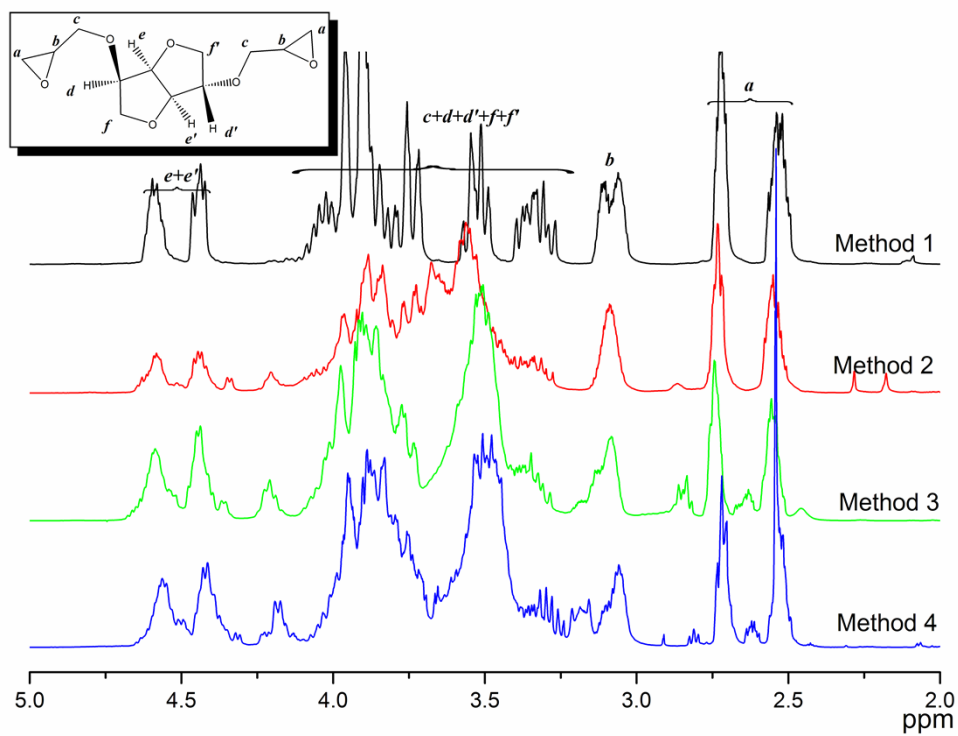

**Fig. S1.**  $^1\text{H}$  NMR spectra of the DGEIs prepared by different methods.

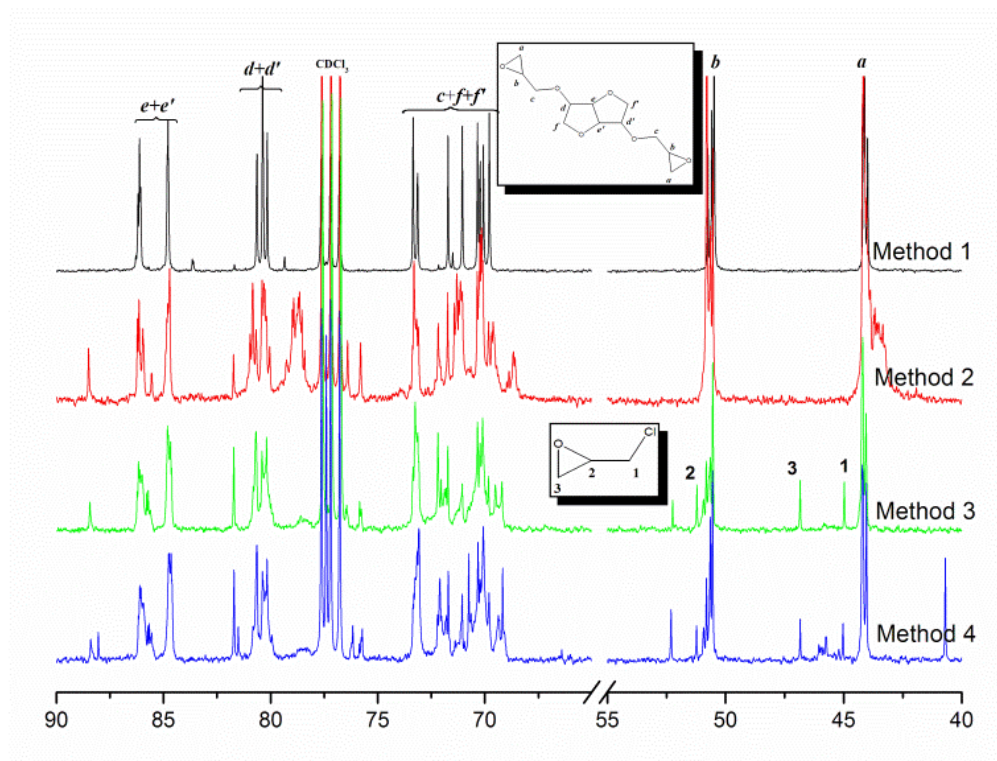

**Fig. S2.**  $^{13}\text{C}$  NMR spectra of the DGEIs prepared by different methods.

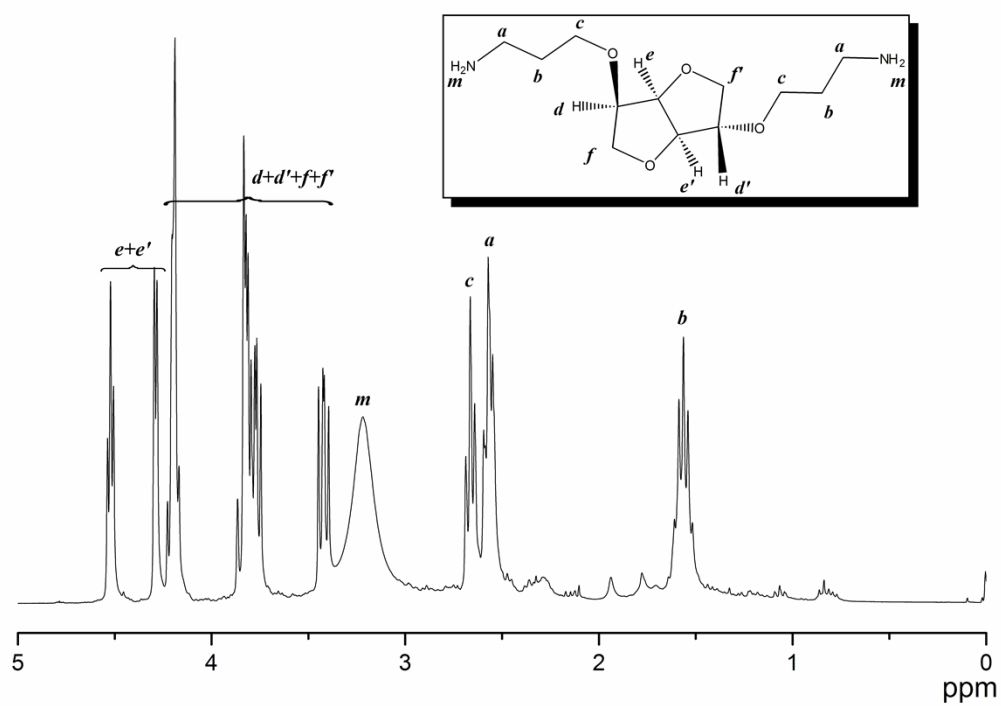

**Fig. S3.**  $^1\text{H}$  NMR spectrum of ISODA

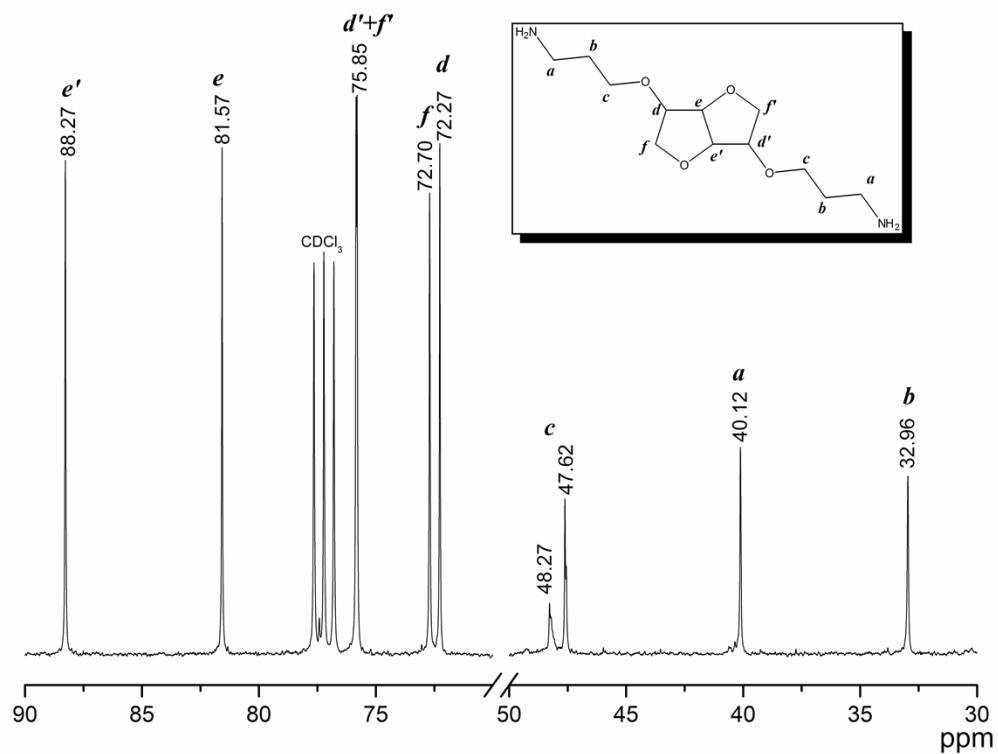

**Fig. S4.**  $^{13}\text{C}$  NMR spectrum of ISODA

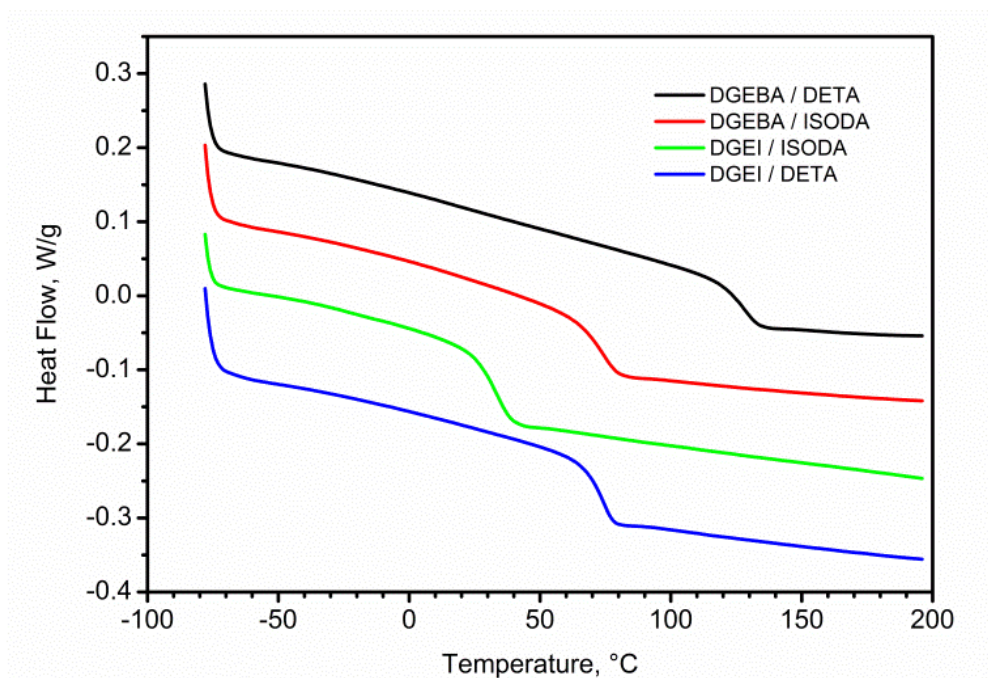

**Fig. S5.** DSC curves for DGEBA and DGEI cured with DETA and ISODA

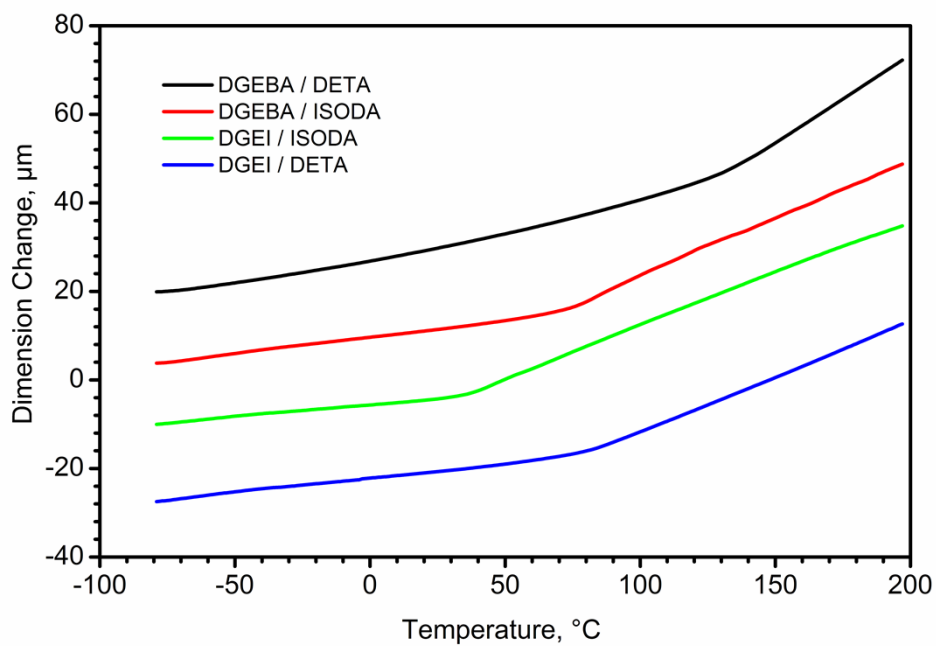

**Fig. S6.** Overlay of TMA curves for DGEBA and DGEI cured with DETA and ISODA
